# Supplementary material for: The Use of Telehealth Among People Living With Dementia-Caregiver Dyads During the COVID-19 Pandemic: Scoping Review
Source: PubMed Central journal article supplement (PMC10251224; doi:10.2196/45045), 2023-05-25
Supplement: jmir_v25i1e45045_app1.pdf [file jmir_v25i1e45045_app1.pdf]

**Multimedia Appendix 1.** Summary table of reviewed articles (n = 24)

| Author, date, country                     | Type of Research                               | Aim                                                                                                                                                                                                                            | Sample                                                                                                                               | Service                                                                                                                                                                                                                                           | Access Consideration                                                                                                                                                                                              | Major Findings                                                                                                                                                                                                                                                                                  |
|-------------------------------------------|------------------------------------------------|--------------------------------------------------------------------------------------------------------------------------------------------------------------------------------------------------------------------------------|--------------------------------------------------------------------------------------------------------------------------------------|---------------------------------------------------------------------------------------------------------------------------------------------------------------------------------------------------------------------------------------------------|-------------------------------------------------------------------------------------------------------------------------------------------------------------------------------------------------------------------|-------------------------------------------------------------------------------------------------------------------------------------------------------------------------------------------------------------------------------------------------------------------------------------------------|
| Dorman et al., 2020<br>Argentina          | Quantitative (two group intervention, not RCT) | To test the effectiveness of a telehealth program that aims to reduce the risk of ADL decline and the onset or worsening of behavioral and psychological symptoms in people living with dementia during the COVID-19 pandemic. | Intervention group: 27 people living with dementia & 19 caregivers;<br>Control group: 11 people living with dementia & 7 caregivers. | A telehealth treatment programs (TTP) consists of 1/2/3 30-min phone calls/week between therapists and the people living with dementia, accompanied with caregivers. Treatment includes cognitive/music/occupational/speech and language therapy. | Not found                                                                                                                                                                                                         | High adherence rate (100%) within the initial 2-month treatment;<br>No significant difference was found in all outcomes (ADL, IADL, depression, anxiety) between intervention and control groups.                                                                                               |
| Lima et al., 2022<br>Brazil               | Quantitative (single group intervention)       | To describe feasibility of telemedicine tools, including patient recruitment, attendance, discomfort, satisfaction, travel time/cost savings.                                                                                  | 85 people living with dementia who used face-to-face service at the study hospital during the previous 12 months.                    | WhatsApp-based remote medical consultation for people living with dementia. Intervention includes text and video treatment, health promotion, drug prescription, diagnostic tests, and referrals. One time similar to face-to-face consultation.  | Send instructions in prior (e.g., choose strong WIFI, have caregiver/family to assist, have test results and medications at hand); Exclude who have no communication technology, and have no caregiver to assist. | Recruitment rate: 85.5% (89/104);<br>Attendance rate: 97.7% (87/89);<br>Completion rate: 97.7% (85/87);<br>Discomfort rate: 9.4% (8/85);<br>Satisfaction rate: 90% accept the telemedicine approach, 45% believe it's effective;<br>Saved 233 min and 11 USD on travel each time.               |
| Moreira-Constantin et al., 2022<br>Brazil | Quantitative (primary survey data analysis)    | To analyze the preferences of caregivers of people living with dementia on the use of telemedicine in monitoring patients.                                                                                                     | 130 caregivers of people living with dementia.                                                                                       | General telemedicine service                                                                                                                                                                                                                      | Not found                                                                                                                                                                                                         | 98% have access to internet, 72% familiar with telemedicine, 33% have used telemedicine, 27% would like to pay for tele-consultation;<br>40% believe telemedicine is the future, 47% think it does not diminish relationship, and 67% believe it has the same validity of face-to-face service. |

|                                 |                                                          |                                                                                                                                                                                                                                   |                                                                                               |                                                                                                                                                                                                                                                                                    |                                                                                                                                                                           |                                                                                                                                                                                                                                                                                                                                                                           |
|---------------------------------|----------------------------------------------------------|-----------------------------------------------------------------------------------------------------------------------------------------------------------------------------------------------------------------------------------|-----------------------------------------------------------------------------------------------|------------------------------------------------------------------------------------------------------------------------------------------------------------------------------------------------------------------------------------------------------------------------------------|---------------------------------------------------------------------------------------------------------------------------------------------------------------------------|---------------------------------------------------------------------------------------------------------------------------------------------------------------------------------------------------------------------------------------------------------------------------------------------------------------------------------------------------------------------------|
| Roach et al.,<br>2020<br>Canada | Qualitative<br>(individual<br>interview)                 | To determine the extent to which the COVID-19 pandemic and related public health measures impacted experiences of health care.                                                                                                    | 2 PLWD and 20 care partners/family members.                                                   | General telemedicine service                                                                                                                                                                                                                                                       | Not found                                                                                                                                                                 | Advantages:<br>Both doctors and participants feel less rushed;<br>Care partners can be more candid if the patients were not in the call;<br>Disadvantages:<br>Less opportunity for care partner to be frank if the patient was present;<br>Technology barriers; Non-verbal information is hard to communicate remotely.                                                   |
| Lai et al.,<br>2020<br>China    | Quantitative<br>(two groups<br>intervention,<br>not RCT) | To test the effectiveness of telehealth delivered via video-conferencing platforms in addition to routine telephone calls on PLWD (65–80 years old) in home care and their spousal caregivers over a period of social distancing. | Intervention group:<br>30 PLWD & 30 caregivers;<br>Control group:<br>30 PLWD & 30 caregivers. | Weekly 30min telephone covering topics and information related to older adults' well-being of community living, focusing on health aging, psychological needs, and physical well-being;<br>Intervention group received additional 30 min video service (Zoom, WhatsApp, Facetime). | Only include those who have caregivers (to provide consent and help set up the connection);<br>Videoconferencing app was pre-installed by caregivers before intervention. | PLWD: Video-based telehealth can better prevent decline of cognitive function and quality of life; memory and behavioral problems not differed between 2 groups;<br>Caregiver: health, burden, and self-efficacy all get worse in control group, while improved in intervention group;<br>The video service facilitate interaction between care-recipient and caregivers. |
| Lee et al.,<br>2021<br>Ireland  | Qualitative<br>(individual<br>interview)                 | To capture how COVID-19 has impacted dementia-inclusive choirs and singing groups in Ireland (facilitators' perception, adaptation, response)?                                                                                    | 12 facilitators of dementia-inclusive singing groups.                                         | Online music therapy activities (singing groups, choirs) on Zoom, WhatsApp, Facebook, YouTube, and other virtual platforms.                                                                                                                                                        | Provide asynchronous resources for participation/practice at any time;<br>Community health worker provide tech support and encourage PLWD to engage.                      | Positive:<br>Online tech provide accessibility and inclusivity, online session keeps PLWD life structured during lockdown, keep PLWD socially connected, give caregiver respite, music inspires online social connection.<br>Negative:<br>In-person experience is irreplaceable, tech can be barriers to users.                                                           |

|                                 |                                                    |                                                                                                                                                                                                                    |                                                                                       |                                                                                                                                                                                                                                                    |                                                                                                                  |                                                                                                                                                                                                                                                                                                          |
|---------------------------------|----------------------------------------------------|--------------------------------------------------------------------------------------------------------------------------------------------------------------------------------------------------------------------|---------------------------------------------------------------------------------------|----------------------------------------------------------------------------------------------------------------------------------------------------------------------------------------------------------------------------------------------------|------------------------------------------------------------------------------------------------------------------|----------------------------------------------------------------------------------------------------------------------------------------------------------------------------------------------------------------------------------------------------------------------------------------------------------|
| Arighi et al., 2021<br>Italy    | Quantitative<br>(primary survey data analysis)     | To describe the digital divide of PLWD contacted by telemedicine during the COVID-19 pandemic and to understand which factors can influence tele-medicine successfulness.                                          | 108 PLWD.                                                                             | General telemedicine service (video-based).                                                                                                                                                                                                        | Instructions to connect were sent by mail;<br>Caregivers were contacted by phone if PLWD cannot connect by self. | 74 (68.5%) successfully connected, 34 failed due to lack of devices and low tech savviness.<br>PLWD with young caregiver are more likely to connect successfully;<br>Successfulness also increase with time.                                                                                             |
| Capozzo et al., 2020<br>Italy   | Quantitative<br>(primary survey data analysis)     | To evaluate whether the assessment of PLWD using telemedicine is feasible and acceptable to patients and caregivers in the era of the COVID-19 pandemic.                                                           | 4 Frontotemporal dementia (FTD) patients and 28 FTD caregivers.                       | Teleconsultation by neurologist to patients or caregivers (60-90 min tele/cell-phone).                                                                                                                                                             | Video option was provided (but refused by all due to lack of devices and low familiarity).                       | 21 participants (66%) completed satisfactory survey;<br>Most (81%) are satisfied with tele-medicine; 88% are satisfied when interacting with neurologist;<br>89.5% agree that tele-consultation help receive service easily at home (70% live far away);<br>90% like to continue this way in the future. |
| Panerai et al., 2021<br>Italy   | Quantitative<br>(two groups intervention, not RCT) | To test effectiveness of telephone-based reality orientation therapy (T-ROT) among patients with major neurocognitive disorders (NCDs) and also whether T-ROT can relieve the burden of distress among caregivers. | Intervention group: 14 dementia care dyads;<br>Control group: 13 dementia care dyads. | Telephone-based Reality Orientation Therapy (T-ROT): stimulation of orientation to time, place, and person to promote a sense of control over the environment.<br>2 assessment sessions + 10 intervention sessions over 4 weeks (3 sessions /week) | Not found                                                                                                        | T-ROT significantly outperformed nontreatment;<br>Intervention group showed decreased symptoms, depression, increase in cognition.<br>Caregivers showed lower burden and distress.                                                                                                                       |
| Marinello et al., 2021<br>Italy | Qualitative<br>(single case report)                | To describe one atypical COVID case that were successfully managed at home thanks to caregivers and telemedicine service.                                                                                          | A 91-year-old older woman with dementia and atypical COVID-19 symptoms.               | Caregivers at home received tele-instruction (video-based training and monitoring) from physicians at hospital to perform treatment on patients;<br>Twice a day.                                                                                   | Not found                                                                                                        | The caregiver with high motivation provided good treatment to the patient under the guidance and supervision of physicians from hospitals;<br>Patient restored and continued using telemedicine until discharge.                                                                                         |

|                                        |                                                                   |                                                                                                                                    |                                                                                                          |                                                                                                                                                                                                                                                                         |                                                                                                                                                                                         |                                                                                                                                                                                                                                                                                             |
|----------------------------------------|-------------------------------------------------------------------|------------------------------------------------------------------------------------------------------------------------------------|----------------------------------------------------------------------------------------------------------|-------------------------------------------------------------------------------------------------------------------------------------------------------------------------------------------------------------------------------------------------------------------------|-----------------------------------------------------------------------------------------------------------------------------------------------------------------------------------------|---------------------------------------------------------------------------------------------------------------------------------------------------------------------------------------------------------------------------------------------------------------------------------------------|
| Cheung & Peri, 2021<br>New Zealand     | Qualitative<br>(a study case report)                              | To describe how tech-based virtual Cognitive Stimulation Therapy (vCST) was used to deliver intervention for PLWD during COVID-19. | 10 groups, no details of participants report.                                                            | 14 sessions (2 session/week) for 7 weeks;<br>45 min per session;<br>6-8 persons per group.                                                                                                                                                                              | Trainers provide guidance on moving service to online;<br>Tech support (e.g., pre-training, check connection);<br>Choose Zoom as platform since most facilitators are familiar with it. | 10 vCST successfully implemented, no other details reported.                                                                                                                                                                                                                                |
| Peri et al., 2022<br>New Zealand       | Qualitative<br>(individual interview)                             | To explore the carer's roles and experiences of supporting PLWD when attending vCST.                                               | 12 carers (38 contacted, 31.6% response rate) recruited via 5 organizations.                             | 14 sessions (2 session/week) for 7 weeks;<br>45 min per session;<br>6-8 persons per group.                                                                                                                                                                              | Pre-training to carers and PLWD on how to access via Zoom;<br>Pre-survey on the IT device ownership.                                                                                    | Carers help with tech set-up and feel positive about learning and improving their tech knowledge;<br>Carers enjoyed the social contact with facilitators, respite time, and sense of connection during vCST;<br>Carers feel both improvement and challenge on their relationship with PLWD. |
| Goodman-Casanova et al., 2020<br>Spain | Quantitative<br>(primary survey data analysis, post intervention) | To study the effects of a television-based assistive integrated technology (TV-AssistDem).                                         | 93 participants recruited from a large project (47 intervention, 46 control); 21 interviewed caregivers. | TV-AssistDem: a television-based service for PLWD to support service on health and well-being, social connectedness, and cognitive stimulation;<br>COVID-19 adapted contents include official information, care measures.                                               | Participants recruited from a large project, thus device has been set-up.                                                                                                               | 58 (64%) feel accessed too much information regarding COVID-19; 29 (31%) request more;<br>No difference in any outcomes between intervention and control groups.                                                                                                                            |
| Cooper et al., 2021<br>UK              | Qualitative<br>(single group intervention)                        | To investigate how acceptable and feasible the intervention was to deliver in practice, in the context of the pandemic.            | 12 PLWD;<br>10 finished all interventions;<br>8 completed post-intervention assessment.                  | APPLE_Tree: video-call, group-based cognitive well-being intervention.<br>10 sessions and every week has: 1-hour group video call (structured), 0.5-hour group video call (tea break, unstructured), and 0.5-hour phone call with 1 facilitator to check and set goals. | Add a facilitator to help adapt remote delivery (internet connection or other tech issues);<br>Gave training/practice before intervention on how to use Zoom (telephone support);       | 83% sessions finished, 64% tea break attendance rate, 82% goals achieved; Overall delivery fidelity is 86%;<br>Although there were tensions for some participants, they enjoyed social aspects of the groups.                                                                               |

|                           |                                    |                                                                                                                                    |                                                                     |                                                                                                                                                                                                                                          |                                                                                                                                                                                         |                                                                                                                                                                                                                                                                                                                     |
|---------------------------|------------------------------------|------------------------------------------------------------------------------------------------------------------------------------|---------------------------------------------------------------------|------------------------------------------------------------------------------------------------------------------------------------------------------------------------------------------------------------------------------------------|-----------------------------------------------------------------------------------------------------------------------------------------------------------------------------------------|---------------------------------------------------------------------------------------------------------------------------------------------------------------------------------------------------------------------------------------------------------------------------------------------------------------------|
| Giebel et al., 2021 UK    | Qualitative (individual interview) | To explore the effects of COVID-19 related social care and social support service closures on the lives of PLWD and unpaid carers. | 42 Carers, 8 PLWD                                                   | Peer support groups shift to remote delivery on Zoom                                                                                                                                                                                     | Not found                                                                                                                                                                               | Only a few shifted online;<br>Feel cannot make up for the face-to-face session;<br>Many lost contact due to tech limit or health conditions.                                                                                                                                                                        |
| Di Lorito et al., 2021 UK | Qualitative (a study case report)  | To identify participants that video delivery worked for; to highlight its benefits and its challenges.                             | 5 dementia care dyads (10 persons); and 5 therapists.               | Q Health: England-approved video patient consultation platform.                                                                                                                                                                          | Provide options of phone or video call;<br>Consent was taken orally;<br>Protocol developed in collaboration with PLWD;<br>Use speakerphone to assure hear and respond to the questions. | Tele-rehabilitation works better for older adults with better physical health (lower risk of falling), digital ability, with caregiver aside, and with good rapport with the therapist.                                                                                                                             |
| Quail et al., 2021 UK     | Qualitative (single case report)   | To describe the transition from in-person dementia therapy and group-based therapeutic activity delivery to digital delivery.      | A man at late 60s referred by his therapist with a diagnosis of AD. | Multimodal programme of interventions aim of attaining meaningful engagement in activities (cognitive stimulation, reminiscence therapy, music therapy, physical exercise, reality orientation, validation therapy); 2-3 times per week. | Award-winning YouTube video freely available to explain therapy;<br>Family got involved to help set up infrastructure.                                                                  | The case person enjoyed improvements in cognition and engagement in activities, which indicates the program prevent the cognitive deterioration due to COVID-19 distress or dementia progression.                                                                                                                   |
| Tuijt et al., 2021 UK     | Qualitative (individual interview) | To explore experiences of remote health care during the COVID-19 pandemic in the community.                                        | 30 PLWD and 31 carers.                                              | General telemedicine service (remote primary care consultations).                                                                                                                                                                        | Purposive sampling tries to reflect a variety of ages, types of dementia, sex, ethnicity, and rurality;<br>Gave options of phone or video call.                                         | Advantages: frequent phone-call check, useful information; most prefer remote consultations;<br>Disadvantages: PLWD has concern on carers' management of all conversations with professionals, low tech literacy, hearing or memory problems, hard to describe symptoms on phone, hard to keep appointment by self. |

|                             |                                             |                                                                                                                                                                                                           |                                                                                                                                                                  |                                                                                                                                                                                                                                          |                                                                         |                                                                                                                                                                                                                                                          |
|-----------------------------|---------------------------------------------|-----------------------------------------------------------------------------------------------------------------------------------------------------------------------------------------------------------|------------------------------------------------------------------------------------------------------------------------------------------------------------------|------------------------------------------------------------------------------------------------------------------------------------------------------------------------------------------------------------------------------------------|-------------------------------------------------------------------------|----------------------------------------------------------------------------------------------------------------------------------------------------------------------------------------------------------------------------------------------------------|
| Gately et al., 2022<br>USA  | Quantitative (single group intervention)    | To evaluate the experience of Veteran dementia dyads on a telehealth program (MLMS).                                                                                                                      | 14 Veteran-caregiver dyads                                                                                                                                       | 1-time Veteran-centric tele-intervention (my life my story, MLMS) via teleconferencing, phone, or a combination. Caregivers were involved to support Veterans. Quantitative experience assessment was conducted in follow-up interviews. | Assisted with technology set-up before interview (e.g., sending links). | 11 used teleconferencing 3 used telephone only; Caregivers helped with tech set-up; Tech experience: most indicated positive experience with scores ranges from 4.5 to 4.9; Interview experience: most ratings are positive ranges from 4.3 to 4.4.      |
| Kalicki et al., 2021<br>USA | Quantitative (primary survey data analysis) | To understand existing video-based telehealth usage and capability among older patients.                                                                                                                  | 16 physician providers, served 1000 (193 congregate housing residents who have tech access were excluded) patients with video-based telehealth since April 2020. | General video-based telehealth services (home-based primary care)                                                                                                                                                                        | N/A; The aim of the study is to identify accessibility of patients.     | 563 (65%) had no tech access; 153 cannot interact over internet by self; 274 need help with internet; 78 do not have caregiver to assist; Physicians have limited knowledge on tech and economic barriers of patients.                                   |
| Macchi et al., 2021<br>USA  | Qualitative (individual interview)          | To describe the impact of COVID-19 on patients living with chronic, neurodegenerative disease and their caregivers.                                                                                       | 108 patients and 90 caregivers.                                                                                                                                  | General telemedicine services                                                                                                                                                                                                            | Not found                                                               | Positive: telecommunications help participants connect with healthcare services and family/friends; Negative: telehealth is considered subpar to in-person services, not a long-term solution, and cannot supplant pre-COVID levels of care.             |
| Masoud et al., 2021<br>USA  | Qualitative (individual interview)          | To describe the experiences of individuals living with dementia and family care partners who regularly attend Memory Cafés, and explores how these gatherings affect perceptions of social connectedness. | 5 PLWD and 12 care partners.                                                                                                                                     | Memory café: group-based activities allow PLWD and caregiver to socialize, focusing on ability still remains, and enjoy life out of caregiving responsibility.                                                                           | Open to non-community resident; Hosted in both English and Spanish.     | 2 in-person only, 9 virtual only, and 6 both. Advantages: respite time, identify life possibilities, connect with community, inclusivity, diversity, additional value added (cognitive stimulation, health education, resource sharing, helping others). |

|                              |                                       |                                                                                                                                                                                      |                                                                      |                                                                                                                                                                                                                                                          |                                                                                                                                                   |                                                                                                                                                                                                                                                                                                                                                                                                                                   |
|------------------------------|---------------------------------------|--------------------------------------------------------------------------------------------------------------------------------------------------------------------------------------|----------------------------------------------------------------------|----------------------------------------------------------------------------------------------------------------------------------------------------------------------------------------------------------------------------------------------------------|---------------------------------------------------------------------------------------------------------------------------------------------------|-----------------------------------------------------------------------------------------------------------------------------------------------------------------------------------------------------------------------------------------------------------------------------------------------------------------------------------------------------------------------------------------------------------------------------------|
| O'Connor et al., 2022<br>USA | Qualitative<br>(individual interview) | To understand how dementia caregivers experienced online support services after switching to videoconferencing during the COVID-19 pandemic.                                         | 10 dementia caregivers<br>(convenience sample from the FSP database) | The NYU Langone ADRD Family Support Program (FSP) provides multiple caregiver support services: comprehensive evaluation, psycho-education, respite care, consultation, and professional referrals. All the programs shifted online due to the pandemic. | Not found                                                                                                                                         | Dementia caregivers felt supported by the online programs: outlet to express frustration, understand the situation, connection with social workers;<br>Some felt more connected via the online support groups, some others felt the relationship diminished due to video telehealth format;<br>Participants' suggestions: more multi-media content and informal venue to connect are needed to foster engagement and connections. |
| Weiss et al., 2021<br>USA    | Qualitative<br>(a study case report)  | To demonstrate a unique approach to reaching culturally diverse and vulnerable population using telehealth, and share some of the lessons learned as a result of early difficulties. | 85 PLWD.                                                             | CACARRE televisit model: introduction, review of health records, treatment, caregiver stress evaluation, advance care planning, emergency planning, respite care,                                                                                        | Allow telephone or live video to build relationship, then move to safe video platform;<br>Approach dyads through multidisciplinary collaboration. | Factors relate to no-show:<br>female, Black, high school graduates;<br>Most feel positive, helpful; caregiver feel all concerns addressed; many hope to return to in-person but maintain televisit for follow-up;<br>Can conduct real-time and accurate assessment;<br>More inclusive and accessible.                                                                                                                             |
